# Supplementary material for: Kidney Decellularized Extracellular Matrix Enhanced the Vascularization and Maturation of Human Kidney Organoids
Source: PubMed Central journal article supplement (PMC9130892; doi:10.1002/advs.202103526), 2022-03-24
Supplement: ADVS-9-2103526-s001.pdf [file ADVS-9-2103526-s001.pdf]

## Supporting Information

### **Kidney decellularized extracellular matrix enhanced the vascularization and maturation of human kidney organoids**

*Jin Won Kim,<sup>1\*</sup> Sun Ah Nam,<sup>1\*</sup> Jawoon Yi,<sup>2\*</sup> Jae Yun Kim,<sup>3\*</sup> Jong Young Lee,<sup>1</sup> Seo-Yeon Park,<sup>1</sup> Tugce Sen,<sup>4</sup> Yoo-mi Choi,<sup>5</sup> Jae Yeon Lee,<sup>6</sup> Hong Lim Kim,<sup>7</sup> Hyung Wook Kim,<sup>8</sup> Jiwhan Park,<sup>2\*</sup> Dong-Woo Cho,<sup>3,4\*</sup> Yong Kyun Kim<sup>1,8\*</sup>*

**Table S1.** Growth factor and cytokine concentrations (pg/ml) in kidney dECM and native kidney samples

|                                                       | <b>Kidney dECM</b> | <b>Native kidney</b> |
|-------------------------------------------------------|--------------------|----------------------|
| Basic fibroblast growth factor (bFGF)                 | 25.63              | 255.3                |
| Endothelial growth factor (EG-VEGF)                   | 27.65              | 486.3                |
| Glial cell-derived neurotrophic factor (GDNF)         | 2.658              | 32.65                |
| Growth hormone (GH)                                   | 110.23             | 2635.3               |
| Insulin-like growth factor-binding protein 1(IGFBP-1) | 63.25              | 785.3                |
| Insulin-like growth factor-binding protein 2(IGFBP-2) | 42.5               | 893.2                |
| Insulin-like growth factor-binding protein 4(IGFBP-4) | 2221.3             | 4555.1               |
| Insulin-like growth factor-binding protein 6(IGFBP-6) | 203.12             | 6826.3               |
| Insulin                                               | 489.33             | 4852.6               |
| Platelet-derived growth factor receptor AA(PDGF-AA)   | 80.69              | 35.69                |
| Placental growth factor (PIGF)                        | 6.39               | 41.32                |
| Transforming growth factor alpha (TGF- $\alpha$ )     | 53.36              | 598.3                |
| Transforming growth factor beta 1 (TGF- $\beta$ 1)    | 5625.3             | 24545.6              |
| Transforming growth factor beta 3 (TGF- $\beta$ 3)    | 186.63             | 523.63               |
| Vascular endothelial growth factor (VEGF)             | 652.36             | 156.39               |
| Vascular endothelial growth factor R2 (VEGF R2)       | 52.36              | 405.36               |

**Table S2.** Most abundant proteins within matrisome (native kidney)

| <b>Uniprot Accession</b> | <b>Gene Name</b> | <b>Protein Name</b>             | <b>Relative abundance (%)</b> |
|--------------------------|------------------|---------------------------------|-------------------------------|
| A0A287ATP0               | HSPG2            | Heparan sulfate proteoglycan 2  | 16.74                         |
| A0A4X1TZA7               | A2M              | Alpha-2-Macroglobulin           | 9.17                          |
| A0A4X1VBD0               | ANXA5            | Annexin                         | 6.36                          |
| A0A4X1UPI9               | TINAG            | SMB domain-containing protein   | 3.96                          |
| A0A4X1TYI6               | LAMC1            | Uncharacterized protein         | 3.95                          |
| F1RQI0                   | COL12A1          | Collagen type XII alpha 1 chain | 3.90                          |
| A0A4X1WE67               | NID2             | Nidogen-2                       | 3.87                          |
| F1RMN7                   | HPX              | Hemopexin                       | 3.80                          |
| P19620                   | ANXA2            | Annexin A2                      | 3.71                          |
| A0A286ZY95               | FN1              | Fibronectin                     | 3.50                          |

**Table S3.** Most abundant proteins within matrisome (kidney dECM)

| <b>Uniprot Accession</b> | <b>Gene Name</b> | <b>Protein Name</b>             | <b>Relative abundance (%)</b> |
|--------------------------|------------------|---------------------------------|-------------------------------|
| A0A287ATP0               | HSPG2            | Heparan sulfate proteoglycan 2  | 30.03                         |
| A0A4X1TYI6               | LAMC1            | Laminin subunit gamma-1         | 10.37                         |
| A0A5G2RJ53               | COL4A2           | Collagen type IV alpha 2 chain  | 10.22                         |
| A0A4X1UPI9               | TINAG            | SMB domain-containing protein   | 7.62                          |
| A0A4X1SK88               | FBN1             | Fibrillin-1                     | 6.47                          |
| F1SAE9                   | LAMB1            | Laminin subunit beta 1          | 4.88                          |
| A0A4X1WE67               | NID2             | Nidogen-2                       | 4.04                          |
| F1RQI0                   | COL12A1          | Collagen type XII alpha 1 chain | 3.99                          |
| I3LJT1                   | NID1             | Nidogen 1                       | 2.94                          |
| A0A4X1SG78               | LUM              | Lumican                         | 1.98                          |

**Table S4.** Real-time quantitative PCR primer list

| <b>Gene</b>            |         | <b>Sequence (5'-3')</b>        |
|------------------------|---------|--------------------------------|
| ABCB1                  | Forward | CCATGCTCAGACAGGATGTG           |
|                        | Reverse | TTCCTGTCCCAAGATTTGCT           |
| Angiotensin2<br>(ANG2) | Forward | ATA AGC AGC ATC AGC CAA CC     |
|                        | Reverse | AAG TTG GAA GGA CCA CAT GC     |
| ATP1A1                 | Forward | CCAATTGTGTTGAAGGCACC           |
|                        | Reverse | CCGTGATGATGTGGATAAAAATGT       |
| COL1                   | Forward | CCC TGG AAA GAA TGG AGA TGA T  |
|                        | Reverse | ACT GAA ACC TCT GTG TCC CTT CA |
| COL4                   | Forward | CGG GTA CCC AGG ACT CAT AG     |
|                        | Reverse | GGA CCT GCT TCA CCC TTT TC     |
| CRABP1                 | Forward | GCAGCAGCGAGAATTTTCGAC          |
|                        | Reverse | CGTGGTGGATGTCTTGATGTAGA        |
| ECAD                   | Forward | TGCCCAGAAAATGAAAAAGG           |
|                        | Reverse | GTGTATGTGGCAATGCGTTC           |
| eNOS                   | Forward | CCT CGT CCC TGT GGA AAG AC     |
|                        | Reverse | GAA TTG ACG CCT TCA CTC GC     |
| Fibronectin            | Forward | GGA GAA TTC AAG TGT GAC CCT CA |
|                        | Reverse | TGC CAC TGT TCT CCT ACG TGG    |
| ITGA5                  | Forward | TGC AGT GTG AGG CTG TGT ACA    |
|                        | Reverse | GTG GCC ACC TGA CGC TCT        |
| ITGB1                  | Forward | GTG GCC ACC TGA CGC TCT        |
|                        | Reverse | GTG GCC ACC TGA CGC TCT        |
| ITGB4                  | Forward | GTG GCC ACC TGA CGC TCT        |
|                        | Reverse | GGT CTC CTC TGT GAT TTG GAA    |
| LRP2                   | Forward | TGTGATGCAGCCATCGAACT           |
|                        | Reverse | TGCATTTGGGGAGGTCAGTC           |
| MAP2                   | Forward | CTCAGCACCGCTAACAGAGG           |
|                        | Reverse | CATTGGCGCTTCGGACAAG            |
| MCAM                   | Forward | CGTCTCGTAAGAGCGAACTTG          |
|                        | Reverse | CGATGTATTTCTCTCCCTGGTC         |
| MYLPF                  | Forward | GAAGGACAGTAGAGGGCGGAA          |
|                        | Reverse | TCTGGTCGATCACAGTGAAGG          |
| NPHS1                  | Forward | GACCCAGCTTCCCATCACTA           |
|                        | Reverse | GCATTGGAGAGGAGCAGAAG           |
| PECAM1                 | Forward | TCATTACGGTCACAATGACGA          |
|                        | Reverse | GAGTATCTGCTTTCCACGGC           |
| PKD1                   | Forward | AACAAGTCTTTGGCCATCAC           |
|                        | Reverse | TACTCGTTCAGCACGGTGAC           |

|         |         |                            |
|---------|---------|----------------------------|
| PKD2    | Forward | TCTTGCCAATTTTCAGCCTTT      |
|         | Reverse | GCACAACGATCACAACATCC       |
| PKHD1   | Forward | CCATTCTCTGCCAGGTTAGC       |
|         | Reverse | ACCCCTAATCAGCACAGTGG       |
| PMEL    | Forward | AGGTGCCTTTCTCCGTGAG        |
|         | Reverse | AGCTTCAGCCAGATAGCCACT      |
| PODXL   | Forward | GATAAGTGCGGCATACGGCT       |
|         | Reverse | GCTCGTACACATCCTTGGCA       |
| SLC34A1 | Forward | TCACGAAGCTCATCATCCAG       |
|         | Reverse | TTCCTCAGGGACTCATCACC       |
| SOD2    | Forward | TAG GGC TGA GGT TTG TCC AG |
|         | Reverse | TAG GGC TGA GGT TTG TCC AG |
| WT1     | Forward | GGGTACGAGAGCGATAACCA       |
|         | Reverse | TCTCACCAGTGTGCTTCCTG       |

**Table S5.** RNA-seq analysis of differentially expressed genes (10<DEGs) in kidney organoid cells

| <b>Cell type</b>                                       | <b>Enriched genes</b>                                                                            | <b>Marker</b>           |
|--------------------------------------------------------|--------------------------------------------------------------------------------------------------|-------------------------|
| <b>SSB pro, S-shaped body proximal segment</b>         | PCP4, CDH6, IFITM3, LAMP5, PAX8, LYPD1, KRT18, KRT8, IGFBP7, SST                                 | IGFBP7, LAMP5           |
| <b>Podocyte</b>                                        | NPHS1, NPHS2, PODXL, MAF8, CTGF, PTPRO, GADD45A, BST2, S100A6, CPXM1, SOST                       | PODXL, NPHS1            |
| <b>SSB pod, S-shaped body podocyte precursor</b>       | PBK, HMMR, OLFM3, FOXC2, MKI67, NUSAP1, CENPF, TPX2, TOP2A, SMC4, HMGB2, PTTG1, TUBA1B, HIST1H4C | PBK, OLFM3, FOXC2, HMMR |
| <b>TP, Tubule progenitor</b>                           | SPP1, FTL, CAMK2N1, MPC2, CLU, ARL4C, ID1, PTGR1, APOE, CKB                                      | SPP1, ID1               |
| <b>PT, Proximal tubule</b>                             | HPN, SPP1, AFP, MT1F, TMEM176A, MT1E, MT1G, MT1X, MT2A, APOE, FTL, MT1H                          | HPN, SPP1               |
| <b>LOH, Loop of Henle</b>                              | WFDC2, MAL, TMEM52B, MAL, DEFB1, LIMCH1, MECOM, HOXD8, GNG11, SAT1, ARL4C                        | WFDC2, MAL              |
| <b>SSB md, S-shaped body medial and distal segment</b> | PAX2, H2AFZ, HMGA1, CENPF, TOP2A, TUBA1B, ARL4C, PTTG1, HMGB2, WFDC2, HIST1H4C                   | HMGA1, PAX2             |
| <b>Mesen, Mesenchyme</b>                               | IGFBP5, IGFBP3, COL3A1, COL1A1, SFRP1, AKAP12, CRABP2, PBX1, IGF2, SST                           | COL1A1, COL3A1          |
| <b>Endothelium1</b>                                    | SOX18, ECSCR, IL32, TMSB4X, GNG11, TMSB10, CALM1, EGFL7, MYL12A, TPM3, FAM107B, FKBP1A           | SOX18, ECSCR            |
| <b>Endothelium2</b>                                    | CD34, KDR, GJA4, ESM1, CD93, ESAM, RAMP2, EGFL7, TCF4, GNG11, CALM1, TMSB4X                      | CD34, KDR               |
| <b>Glial</b>                                           | RFX4, MSX1, SOX2, METRN, BEX1, TUBA1A, IGDCC3, LIMCH1, TTYH1, NEFM                               | MSX1, SOX2              |
| <b>Melanoma</b>                                        | PLP1, PMEL, TFAP2B, DCT, EDNRB, POSTN, LMO4, CRABP1, METRN, CENPF                                | PMEL, PLP1              |

|                   |                                                                                              |                            |
|-------------------|----------------------------------------------------------------------------------------------|----------------------------|
| <b>Neuron</b>     | STMN2, TAGLN3, DLL3, CRABP1,<br>HES6, TUBB2B, MAP1B, SOX4,<br>CALM1, TUBA1A                  | DLL3,<br>HES6              |
| <b>RV.CSB</b>     | FAM211A, CTNNB1, HNRNPH1, MT-<br>ND1, EIF5A, ARL4C, HMGA1,<br>MTRNR2L12, PTPRS               | CTNNB1                     |
| <b>Precursor</b>  | MTRNR2L12, 75K.2                                                                             | MTRNR2L12                  |
| <b>Cell cycle</b> | NUSAP1, UBE2C, TOP2A, MKI67,<br>HMGB2, H2AFZ, TUBA1B, HIST1H4C,<br>HIST1H1B, HIST1H3D, PTTG1 | TOP2A,<br>MKI67,<br>UBE2C, |



**Table S6.** Summary of statistical analysis

|                                                  | Comparison                                                 | N                     | P value | Significance |
|--------------------------------------------------|------------------------------------------------------------|-----------------------|---------|--------------|
| <b>Figure 2c</b>                                 | Matrigel based protocol vs. Protocol A                     | 10 (Organoid number)  | <0.0001 | Y            |
|                                                  | Matrigel based protocol vs. Protocol B                     | 10 (Organoid number)  | <0.0001 | Y            |
|                                                  | Matrigel based protocol+VEGF vs. Protocol A                | 10 (Organoid number)  | <0.0001 | Y            |
|                                                  | Matrigel based protocol+VEGF vs. Protocol B                | 10 (Organoid number)  | <0.0001 | Y            |
| <b>Figure 2e</b>                                 | Matrigel based protocol vs. Protocol A                     | 3 (Experiment number) | 0.0201  | Y            |
|                                                  | Matrigel based protocol vs. Protocol B                     | 3 (Experiment number) | <0.0001 | Y            |
|                                                  | Matrigel based protocol+VEGF vs. Protocol A                | 3 (Experiment number) | 0.0308  | Y            |
|                                                  | Matrigel based protocol+VEGF vs. Protocol B                | 3 (Experiment number) | <0.0001 | Y            |
|                                                  | Protocol A vs. Protocol B                                  | 3 (Experiment number) | 0.0024  | Y            |
| <b>Figure 2g</b>                                 | Matrigel based protocol vs. Protocol B                     | 3 (Experiment number) | <0.0001 | Y            |
|                                                  | Matrigel based protocol+VEGF vs. Protocol B                | 3 (Experiment number) | <0.0001 | Y            |
|                                                  | Protocol A vs. Protocol B                                  | 3 (Experiment number) | <0.0001 | Y            |
| <b>Figure 2i</b>                                 | Matrigel based protocol vs. Matrigel based protocol + VEGF | 3 (Experiment number) | 0.0089  | Y            |
|                                                  | Matrigel based protocol vs. Protocol A                     | 3 (Experiment number) | <0.0001 | Y            |
|                                                  | Matrigel based protocol vs. Protocol B                     | 3 (Experiment number) | <0.0001 | Y            |
|                                                  | Matrigel based protocol + VEGF vs. Protocol A              | 3 (Experiment number) | <0.0001 | Y            |
|                                                  | Matrigel based protocol + VEGF vs. Protocol B              | 3 (Experiment number) | <0.0001 | Y            |
|                                                  | Protocol A vs. Protocol B                                  | 3 (Experiment number) | <0.0001 | Y            |
| <b>Figure 2j</b>                                 | Matrigel based protocol vs. Protocol A                     | 3 (Experiment number) | <0.0001 | Y            |
|                                                  | Matrigel based protocol vs. Protocol B                     | 3 (Experiment number) | <0.0001 | Y            |
|                                                  | Matrigel based protocol + VEGF vs. Protocol A              | 3 (Experiment number) | <0.0001 | Y            |
|                                                  | Matrigel based protocol + VEGF vs. Protocol B              | 3 (Experiment number) | <0.0001 | Y            |
|                                                  | Protocol A vs. Protocol B                                  | 3 (Experiment number) | <0.0001 | Y            |
| <b>Figure 3b</b>                                 | Matrigel based protocol vs. Matrigel based protocol+VEGF   | 3 (Experiment number) | 0.9633  | N            |
|                                                  | Matrigel based protocol vs. Protocol A                     | 3 (Experiment number) | 0.0003  | Y            |
|                                                  | Matrigel based protocol vs. Protocol B                     | 3 (Experiment number) | <0.0001 | Y            |
|                                                  | Matrigel based protocol+VEGF vs. Protocol A                | 3 (Experiment number) | 0.0005  | Y            |
|                                                  | Matrigel based protocol+VEGF vs. Protocol B                | 3 (Experiment number) | <0.0001 | Y            |
|                                                  | Protocol A vs. Protocol B                                  | 3 (Experiment number) | 0.0436  | Y            |
| <b>Figure 4c</b>                                 | Matrigel based protocol vs. Protocol A                     | 4 (Experiment number) | 0.0384  | Y            |
|                                                  | Matrigel based protocol vs. Protocol B                     | 4 (Experiment number) | 0.0004  | Y            |
|                                                  | Protocol A vs. Protocol B                                  | 4 (Experiment number) | 0.0230  | Y            |
| <b>Figure 4e</b>                                 | Matrigel based protocol vs. Protocol A                     | 4 (Experiment number) | 0.0029  | Y            |
|                                                  | Matrigel based protocol vs. Protocol B                     | 4 (Experiment number) | <0.0001 | Y            |
|                                                  | Protocol A vs. Protocol B                                  | 4 (Experiment number) | 0.0337  | Y            |
| <b>Figure 4f</b>                                 | PKD1 : Matrigel based protocol vs. Protocol A              | 3 (Experiment number) | 0.0008  | Y            |
|                                                  | PKD1 : Matrigel based protocol vs. Protocol B              | 3 (Experiment number) | <0.0001 | Y            |
|                                                  | PKD1 : Protocol A vs. Protocol B                           | 3 (Experiment number) | 0.5977  | N            |
|                                                  | PKD2 : Matrigel based protocol vs. Protocol A              | 3 (Experiment number) | 0.1241  | N            |
|                                                  | PKD2 : Matrigel based protocol vs. Protocol B              | 3 (Experiment number) | 0.0005  | Y            |
|                                                  | PKD2 : Protocol A vs. Protocol B                           | 3 (Experiment number) | 0.0409  | Y            |
|                                                  | PKDH1 : Matrigel based protocol vs. Protocol A             | 3 (Experiment number) | <0.0001 | Y            |
|                                                  | PKDH1 : Matrigel based protocol vs. Protocol B             | 3 (Experiment number) | <0.0001 | Y            |
|                                                  | PKDH1 : Protocol A vs. Protocol B                          | 3 (Experiment number) | 0.9935  | N            |
| SLC34A1 : Matrigel based protocol vs. Protocol A | 3 (Experiment number)                                      | <0.0001               | Y       |              |

|                           |                                                                                |                       |         |   |
|---------------------------|--------------------------------------------------------------------------------|-----------------------|---------|---|
| <b>Figure 4f</b>          | SLC34A1 : Matrigel based protocol vs. Protocol B                               | 3 (Experiment number) | <0.0001 | Y |
|                           | SLC34A1 : Protocol A vs. Protocol B                                            | 3 (Experiment number) | 0.1511  | N |
|                           | ATP1A1 : Matrigel based protocol vs. Protocol A                                | 3 (Experiment number) | 0.0002  | Y |
|                           | ATP1A1 : Matrigel based protocol vs. Protocol B                                | 3 (Experiment number) | 0.0362  | Y |
|                           | ATP1A1 : Protocol A vs. Protocol B                                             | 3 (Experiment number) | 0.0218  | Y |
|                           | ABCB1 : Matrigel based protocol vs. Protocol A                                 | 3 (Experiment number) | <0.0001 | Y |
|                           | ABCB1 : Matrigel based protocol vs. Protocol B                                 | 3 (Experiment number) | 0.2178  | N |
|                           | ABCB1 : Protocol A vs. Protocol B                                              | 3 (Experiment number) | <0.0001 | Y |
|                           | LRP2 : Matrigel based protocol vs. Protocol A                                  | 3 (Experiment number) | <0.0001 | Y |
|                           | LRP2 : Matrigel based protocol vs. Protocol B                                  | 3 (Experiment number) | <0.0001 | Y |
|                           | LRP2 : Protocol A vs. Protocol B                                               | 3 (Experiment number) | 0.7892  | N |
|                           | NPHS1 : Matrigel based protocol vs. Protocol A                                 | 3 (Experiment number) | <0.0001 | Y |
|                           | NPHS1 : Matrigel based protocol vs. Protocol B                                 | 3 (Experiment number) | <0.0001 | Y |
|                           | NPHS1 : Protocol A vs. Protocol B                                              | 3 (Experiment number) | <0.0001 | Y |
|                           | WT1 : Matrigel based protocol vs. Protocol A                                   | 3 (Experiment number) | <0.0001 | Y |
|                           | WT1 : Matrigel based protocol vs. Protocol B                                   | 3 (Experiment number) | 0.0015  | Y |
|                           | WT1 : Protocol A vs. Protocol B                                                | 3 (Experiment number) | 0.4219  | N |
|                           | PODXL : Matrigel based protocol vs. Protocol A                                 | 3 (Experiment number) | <0.0001 | Y |
|                           | PODXL : Matrigel based protocol vs. Protocol B                                 | 3 (Experiment number) | <0.0001 | Y |
|                           | PODXL : Protocol A vs. Protocol B                                              | 3 (Experiment number) | <0.0001 | Y |
| <b>Figure 4f</b>          | ECAD : Matrigel based protocol vs. Protocol A                                  | 3 (Experiment number) | <0.0001 | Y |
|                           | ECAD : Matrigel based protocol vs. Protocol B                                  | 3 (Experiment number) | 0.0115  | Y |
|                           | ECAD : Protocol A vs. Protocol B                                               | 3 (Experiment number) | <0.0001 | Y |
| <b>Figure 4h</b>          | Matrigel based protocol vs. Matrigel based protocol+VEGF                       | 3 (Experiment number) | 0.9709  | N |
|                           | Matrigel based protocol vs. Protocol A                                         | 3 (Experiment number) | 0.0348  | Y |
|                           | Matrigel based protocol vs. Protocol B                                         | 3 (Experiment number) | 0.0002  | Y |
|                           | Matrigel based protocol+VEGF vs. Protocol A                                    | 3 (Experiment number) | 0.0640  | N |
|                           | Matrigel based protocol+VEGF vs. Protocol B                                    | 3 (Experiment number) | 0.0003  | Y |
| Protocol A vs. Protocol B | 3 (Experiment number)                                                          | 0.0094                | Y       |   |
| <b>Figure 7e</b>          | Wild type vs. GLA mutant 2                                                     | 3 (Experiment number) | 0.0006  | Y |
|                           | GLA mutant 2 vs. GLA mutant 2 + ERT                                            | 3 (Experiment number) | 0.0045  | Y |
| <b>Figure 7h</b>          | SOD : Wild type vs. GLA mutant 2                                               | 3 (Experiment number) | 0.03    | Y |
|                           | eNOS : Wild type vs. GLA mutant 2                                              | 3 (Experiment number) | <0.0001 | Y |
|                           | eNOS : Wild type vs. GLA mutant 2 + ERT                                        | 3 (Experiment number) | 0.0002  | Y |
|                           | ANG2 : Wild type vs. GLA mutant 2                                              | 3 (Experiment number) | 0.0334  | Y |
| <b>Figure 8b</b>          | Transplanted organoids vs. Transplanted organoids with kidney dECM             | 6 (Organoid number)   | 0.0026  | Y |
| <b>Figure S2 b</b>        | Day 0 vs. Day 3                                                                | 3 (Experiment number) | 0.0210  | Y |
|                           | Day 0 vs. Day 6                                                                | 3 (Experiment number) | 0.0017  | Y |
|                           | Day 0 vs. Day 9                                                                | 3 (Experiment number) | 0.0005  | Y |
|                           | Day 0 vs. Day 12                                                               | 3 (Experiment number) | 0.0003  | Y |
|                           | Day 0 vs. Day 15                                                               | 3 (Experiment number) | 0.0001  | Y |
|                           | Day 0 vs. Day 18                                                               | 3 (Experiment number) | 0.0001  | Y |
| <b>Figure S2 d</b>        | ITGB4 : Matrigel based protocol vs. Protocol A                                 | 3 (Experiment number) | <0.0001 | Y |
|                           | ITGB4 : Matrigel based protocol vs. Protocol B                                 | 3 (Experiment number) | <0.0001 | Y |
|                           | COL1 : Matrigel based protocol vs. Protocol B                                  | 3 (Experiment number) | <0.0001 | Y |
|                           | COL1 : Protocol A vs. Protocol B                                               | 3 (Experiment number) | <0.0001 | Y |
|                           | FN : Matrigel based protocol vs. Protocol B                                    | 3 (Experiment number) | <0.0001 | Y |
|                           | FN : Protocol A vs. Protocol B                                                 | 3 (Experiment number) | 0.0177  | Y |
| <b>Figure S7 f</b>        | MAP2 : Matrigel based protocol vs Matrigel based protocol + Twist1 inhibitor   | 3 (Experiment number) | 0.0003  | Y |
|                           | CRABP1 : Matrigel based protocol vs Matrigel based protocol + Twist1 inhibitor | 3 (Experiment number) | 0.5552  | N |
|                           | MYLPF : Matrigel based protocol vs Matrigel based protocol + Twist1 inhibitor  | 3 (Experiment number) | <0.0001 | Y |

|                        |                                                                             |                       |        |   |
|------------------------|-----------------------------------------------------------------------------|-----------------------|--------|---|
| <b>Figure S8<br/>b</b> | Matrigel based protocol vs. Matrigel based protocol + Bevacizumab           | 3 (Experiment number) | 0.9891 | N |
|                        | Matrigel based protocol+VEGF vs. Matrigel based protocol+VEGF + Bevacizumab | 3 (Experiment number) | 0.2913 | N |
|                        | Protocol A vs. Protocol A + Bevacizumab                                     | 3 (Experiment number) | 0.0054 | Y |
|                        | Protocol B vs. Protocol B + Bevacizumab                                     | 3 (Experiment number) | 0.0005 | Y |

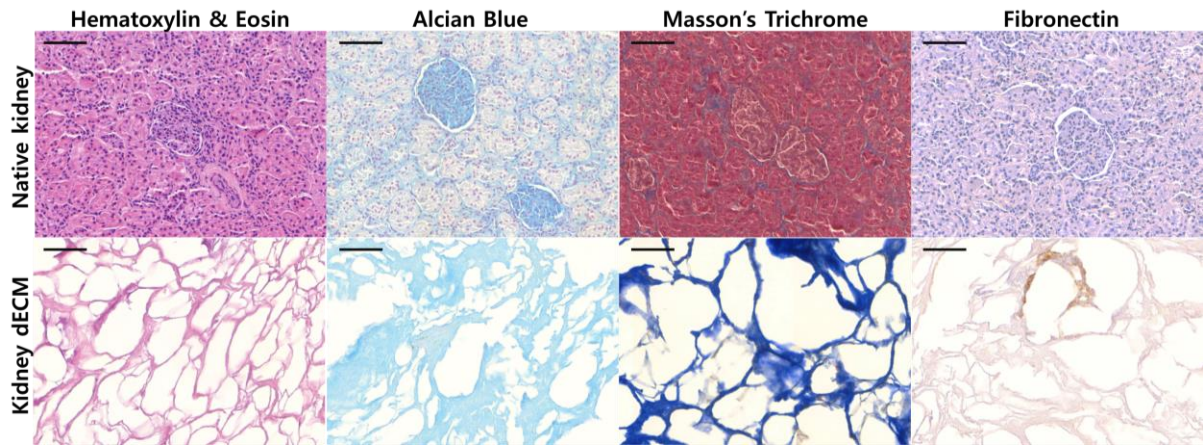

**Figure S1.** High-magnification (15x) images of kidney tissue before decellularization (Native kidney) and after decellularization (Kidney dECM) for H&E, Alcian Blue, Masson's Trichrome, and fibronectin. (Scale bar = 100 $\mu$ m)

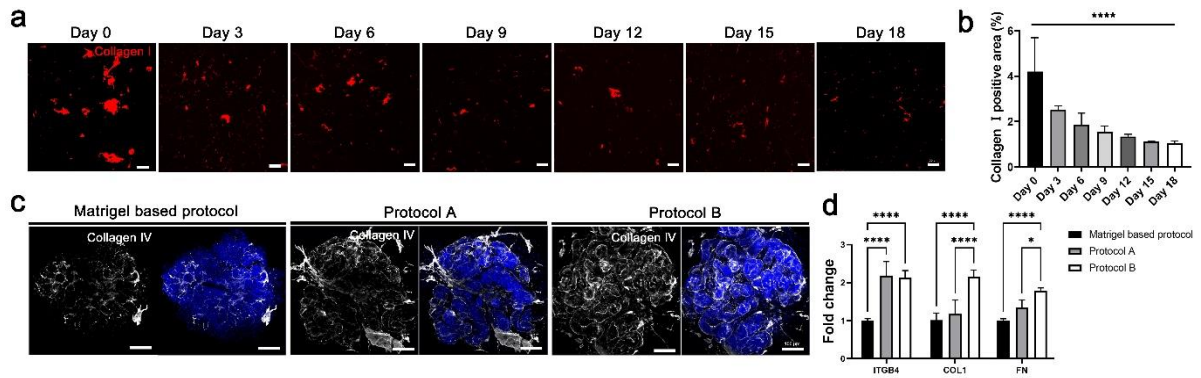

**Figure S2.** Monitoring the degradation nature of collagen I of the coated kidney dECM (a,b) and kidney dECM remodeling analysis (c,d) a) Representative fluorescence image of collagen I stained by date on a confocal plate coated with 0.1% kidney dECM. b) Quantification of the percentage of collagen I positive area. (n=3). Values are mean  $\pm$  SD. \*\*\*\*,  $p < 0.0001$ , measured by One-way ANOVA with Dunnett's multiple comparisons test. c) Representative fluorescence image of collagen IV of kidney organoids cultured by Matrigel-based protocol, protocol A and protocol B. d) qRT-PCR analysis of Integrin receptors (ITGB4), Fibronectin (FN), Collagen I. (n=3). Values are mean  $\pm$  SEM. \*,  $p < 0.05$ , \*\*\*\*,  $p < 0.0001$ , measured by two-way ANOVA with Tukey's multiple comparisons test.

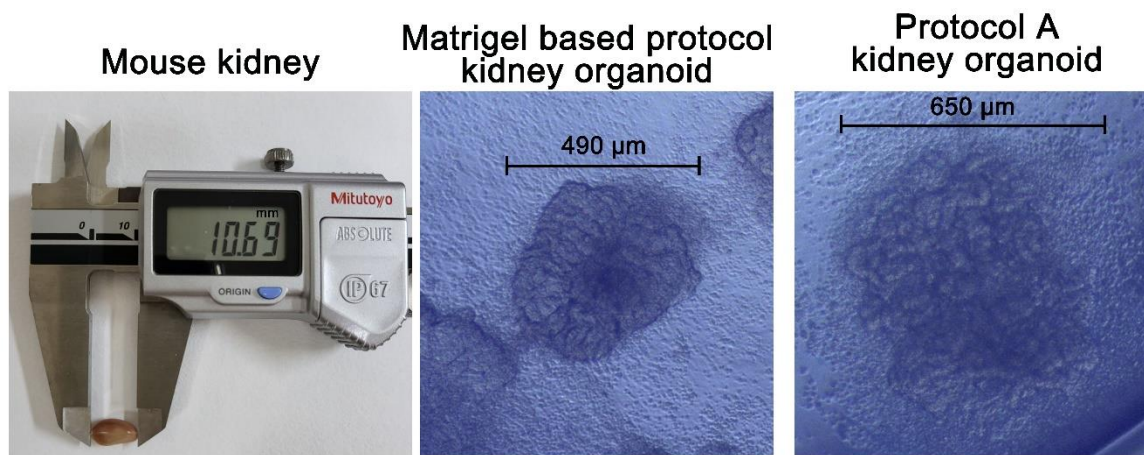

**Figure S3.** Comparison of mouse kidney and kidney organoid size. The mouse kidney size is 10.69 mm, the kidney organoid differentiated in Matrigel based protocol is 490 μm and the size of the kidney organoid differentiated in protocol A is 650 μm.

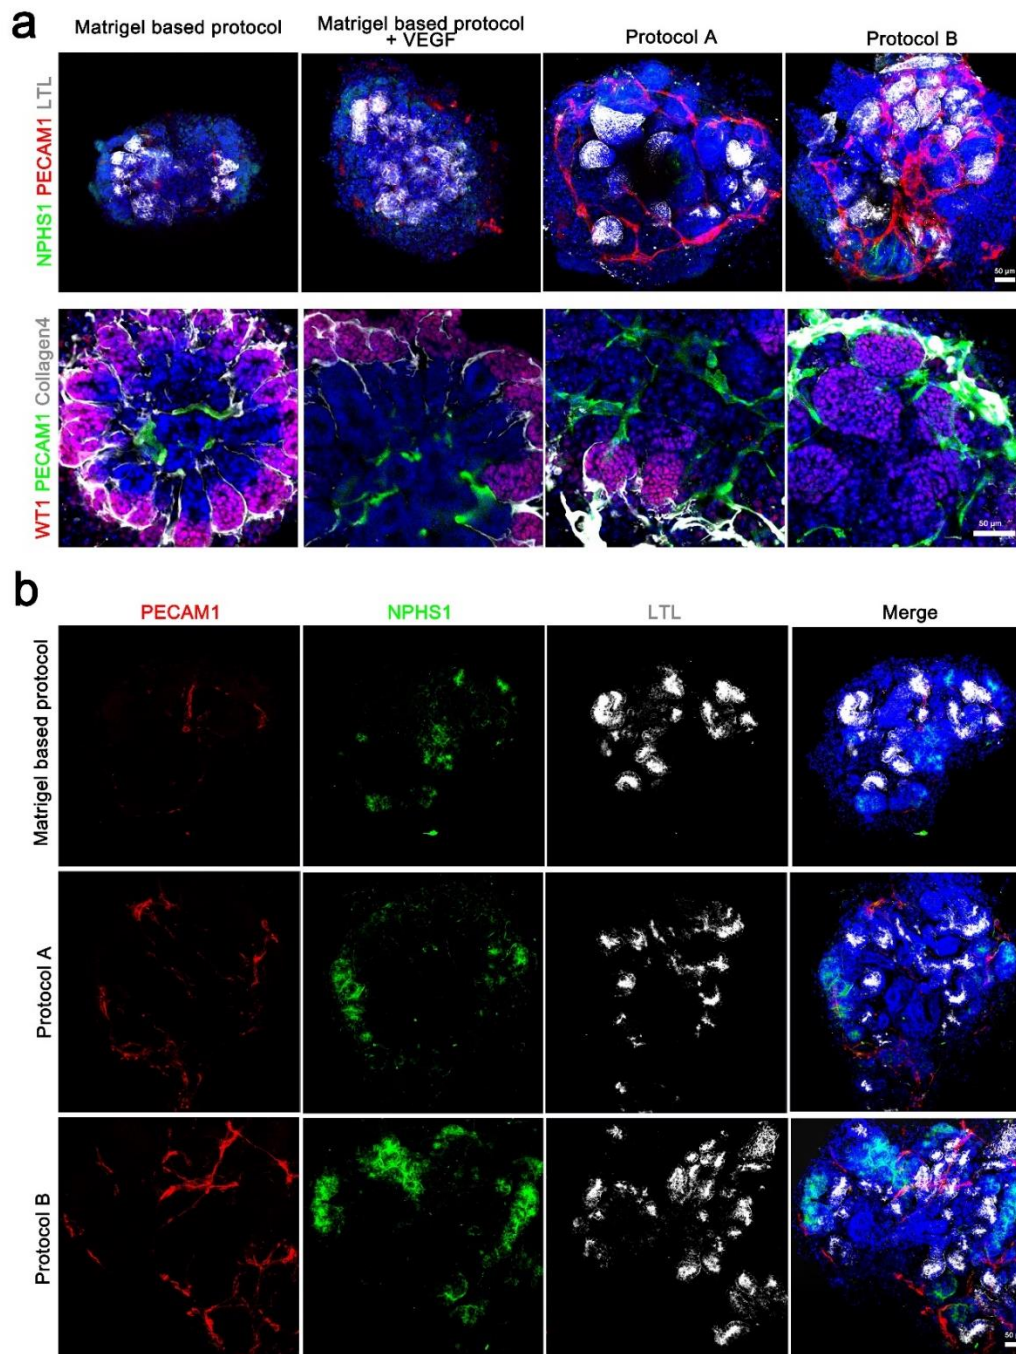

**Figure S4.** Low magnification images and images of immunofluorescent staining from CMC11 human pluripotent stem cell line. a) Representative low magnification images of immunofluorescent staining of NPHS1, PECAM1 and LTL in Figure 2d and WT1, PECAM1 and Collagen IV in Figure 2f. Scale bar = 50  $\mu$ m. b) Kidney organoids differentiated from CMC11 iPSC cell line. Representative images of immunofluorescent staining of PECAM1, NPHS1 and LTL. Scale bar = 50  $\mu$ m.

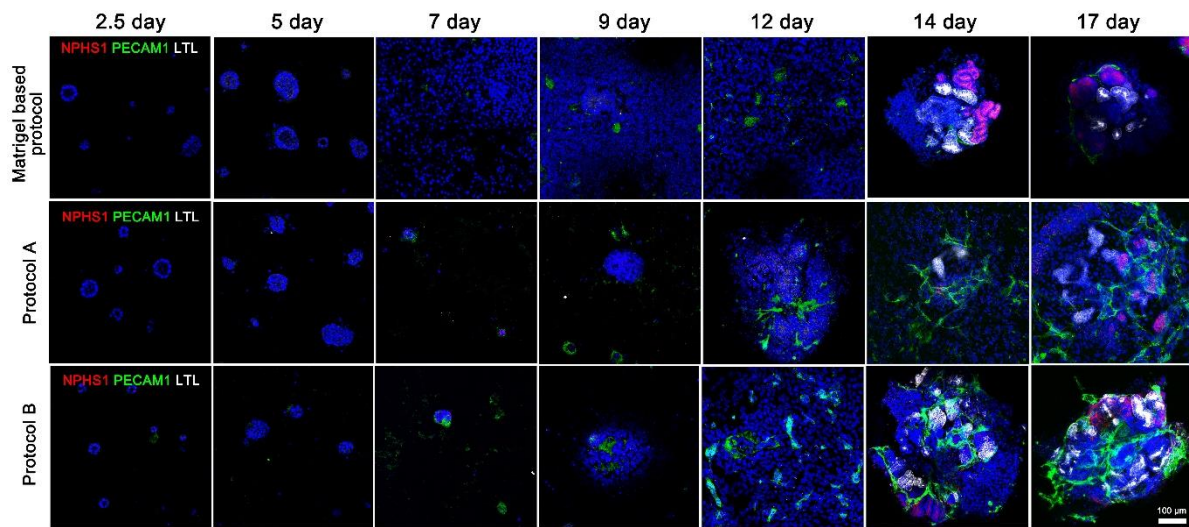

**Figure S5.** Monitoring the time of formation of endogenous PECAM1+ endothelial cells during the kidney organoids culture. Representative fluorescence image of NPHS1, PECAM1 and LTL from 2.5 to 17 days of kidney organoid differentiation.



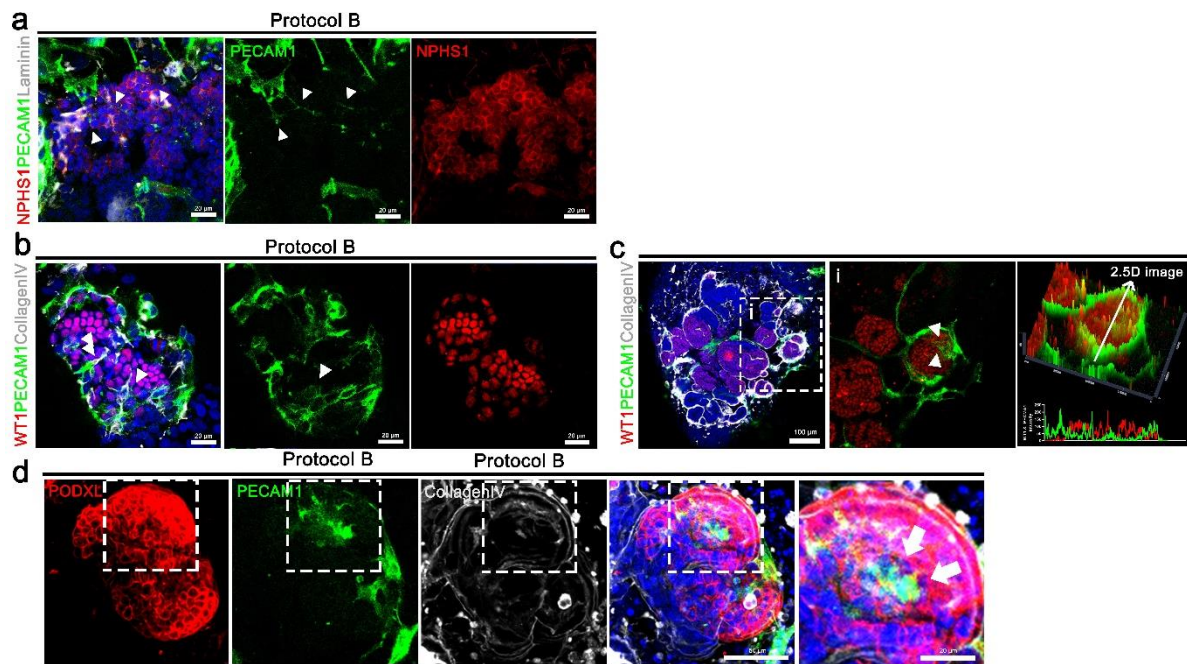

**Figure S6.** Enhanced vascularization of kidney organoids in protocol B. a) Representative images of immunofluorescent staining of NPHS1, PECAM1 and Laminin in kidney organoids. Invasion of PECAM1<sup>+</sup> endothelial cells into NPHS1<sup>+</sup> podocytes clusters (white arrowhead). Scale bar = 20  $\mu$ m. b, c) Representative images of immunofluorescent staining of WT1, PECAM1 and Collagen IV in kidney organoids differentiated by protocol B. Invasion of PECAM1<sup>+</sup> endothelial cells into WT1<sup>+</sup> podocytes clusters (white arrowhead). Scale bar = 20  $\mu$ m for b. Line scan of PECAM1 and WT1 showed line scan showing the invasion of PECAM1<sup>+</sup> endothelial cells into WT1<sup>+</sup> podocytes clusters in the panel (i) (white arrowhead). Scale bar = 100  $\mu$ m for c. d) Representative images of immunofluorescent staining of PODXL (podocalyxin), PECAM1 and Collagen IV. White arrow indicated apico-basal polarity. Scale bar = 50  $\mu$ m and 20  $\mu$ m.

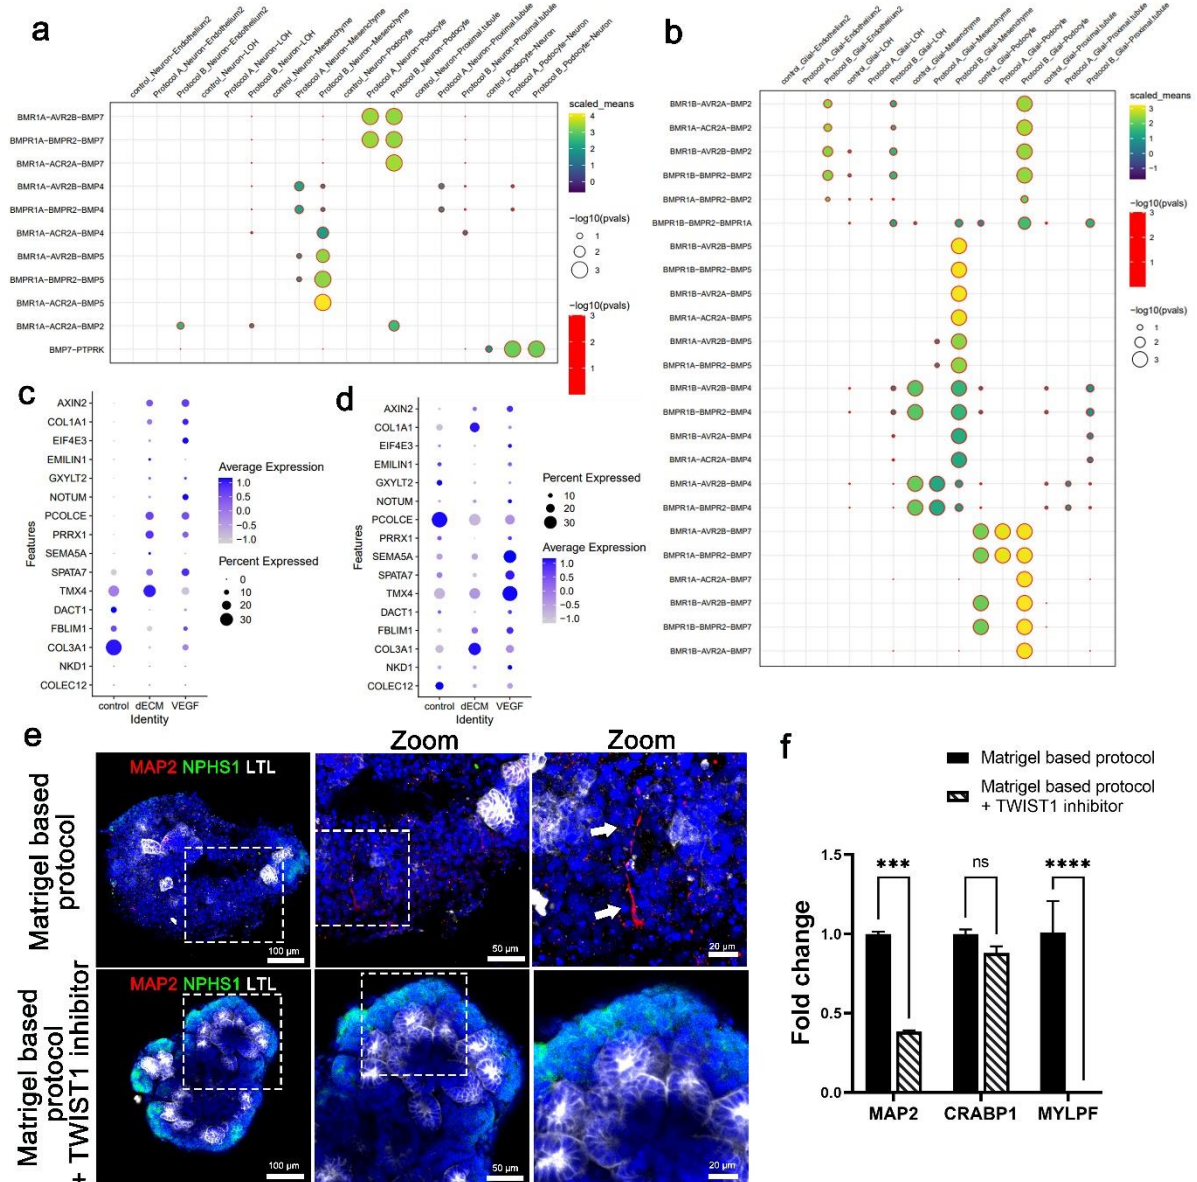

**Figure S7.** Analysis of the expression level of TWIST1 regulon in neurons and glial cells by RNA-seq analysis and treatment with TWIST1 inhibitor in kidney organoids. a) Bubble plot showing the BMP interaction in the neurons of kidney organoid in protocols A and B. b) Bubble plot showing the BMP interaction in the glial cells of kidney organoid in protocols A and B. c) Bubble plot showing the TWIST1 regulon expression levels in neurons. d) Bubble plot showing the TWIST1 regulon expression levels in glial cells. e) Immunofluorescent images of MAP2, NPHS1 and LTL staining after TWIST1 inhibitor (Harmine) treatment on kidney organoids differentiated in Matrigel-based protocol. f) qRT-PCR analysis of MAP2, CRABP1 and MYLPF. (n=2). Values are mean  $\pm$  SEM. NS, no significance, \*\*\*,  $p < 0.001$ , \*\*\*\*,  $p < 0.0001$ , measured by Two-way ANOVA with Šídák's' multiple comparisons test

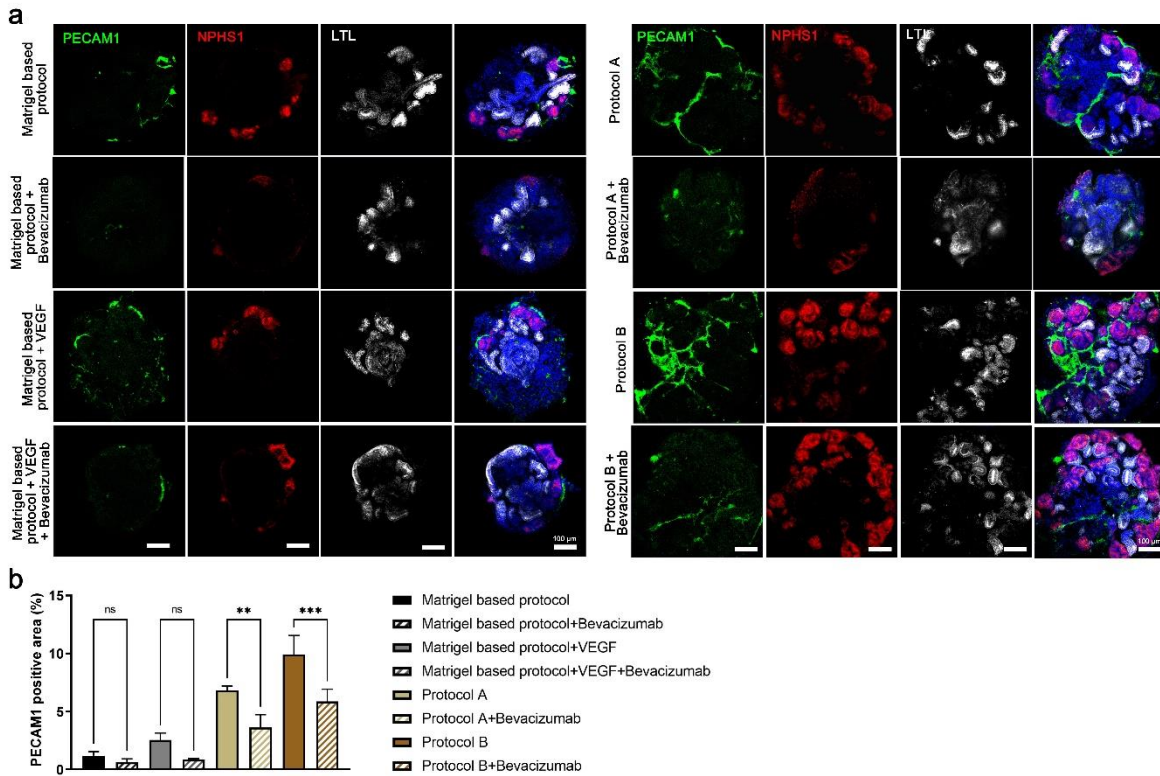

**Figure S8.** VEGF inhibitor-treated kidney organoids according to the differentiation protocols. a) Immunofluorescent images of PECAM1, NPHS1 and LTL staining after VEGF inhibitor (Bevacizumab) treatment on kidney organoids of four groups. b) Quantification of the percentage of PECAM1 positive area. (n=3). Values are mean  $\pm$  SEM. \*\*,  $p < 0.01$ , \*\*\*,  $p < 0.001$ , measured by t test.
